# Supplementary material for: Theoretical exploration on the electronic and magnetic properties of (FeCp)n– (n = 1, 2) ligand-functionalized graphene
Source: Royal Society of Chemistry journal article supplement (doi:10.1039/c7ra01617d), 2017-01-01
Supplement: c7ra01617d1.pdf [file c7ra01617d1.pdf]

Theoretical Exploration on the Electronic and Magnetic Properties of  $(\text{FeCp})_n^-$  ( $n=1, 2$ ) Ligands  
Functionalized Graphene

Supporting Information

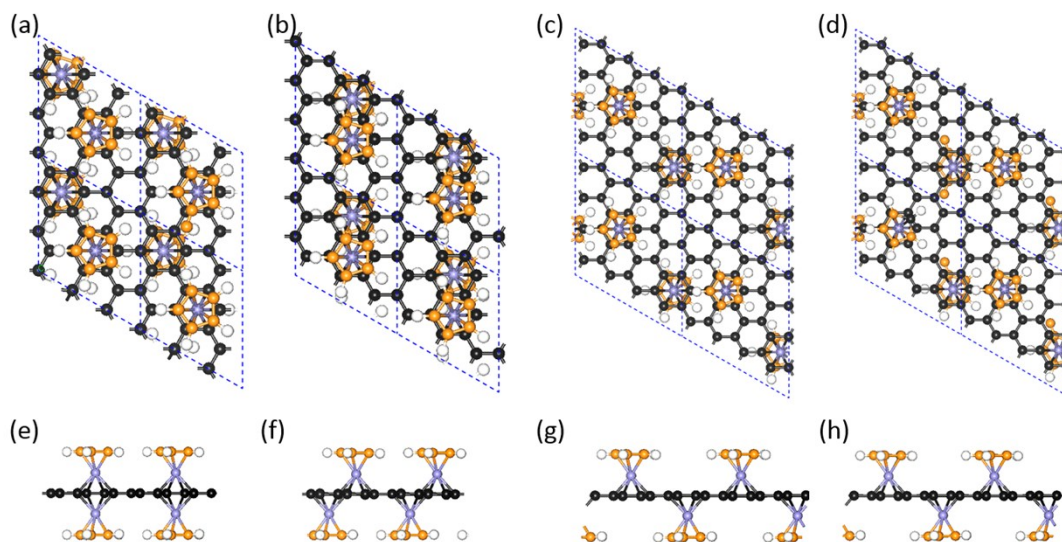

Figure S1. 2x2 supercell of  $(\text{FeCp})_2@G_{33}\text{-D}_1$ (a,e),  $(\text{FeCp})_2@G_{33}\text{-D}_2$ (b,f),  $(\text{FeCp})_2@G_{44}\text{-D}_4$ (c,g) and  $(\text{FeCp})_2@G_{44}\text{-D}_5$ (d,h). Black, Orange balls represents carbon atoms; white, purple balls represent H atoms and Fe atoms.

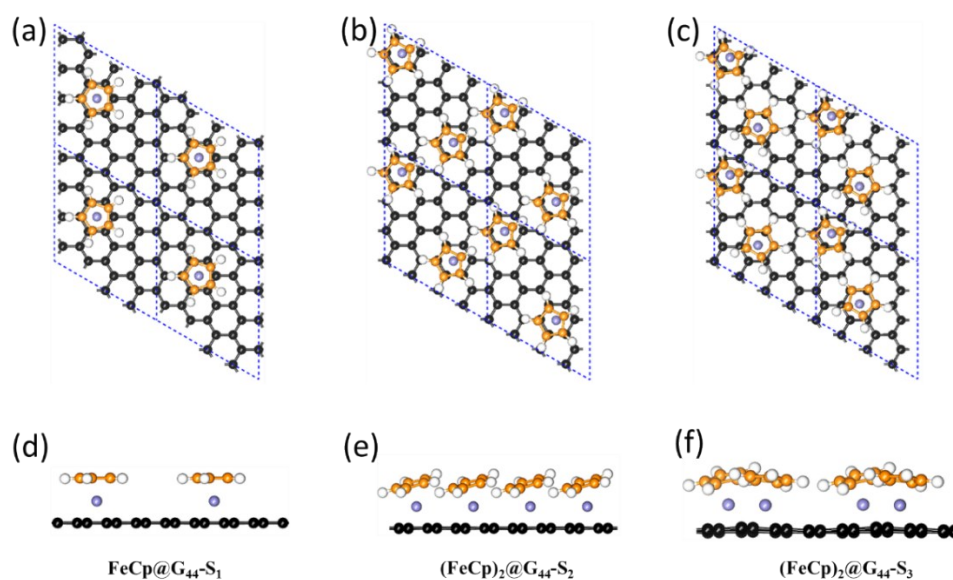

Figure S2. Scheme of  $(\text{FeCp})_n@G_{33}$ ,  $n=1, 2$ . Optimized structure of  $\text{FeCp}@G_{44}\text{-S}_1$ ,  $(\text{FeCp})_2@G_{44}\text{-S}_2$  and  $(\text{FeCp})_2@G_{44}\text{-S}_3$ , respectively. Black, Orange balls represents carbon atoms; white, purple balls represent H atoms and Fe atoms.

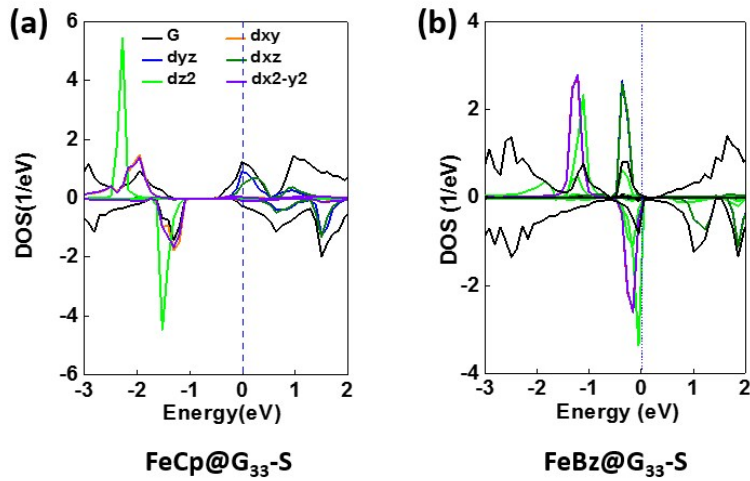

Figure S3. Density of states plots of  $\text{FeCp}@G_{33}\text{-S}$  and  $\text{FeCp}@G_{44}\text{-S}$ .

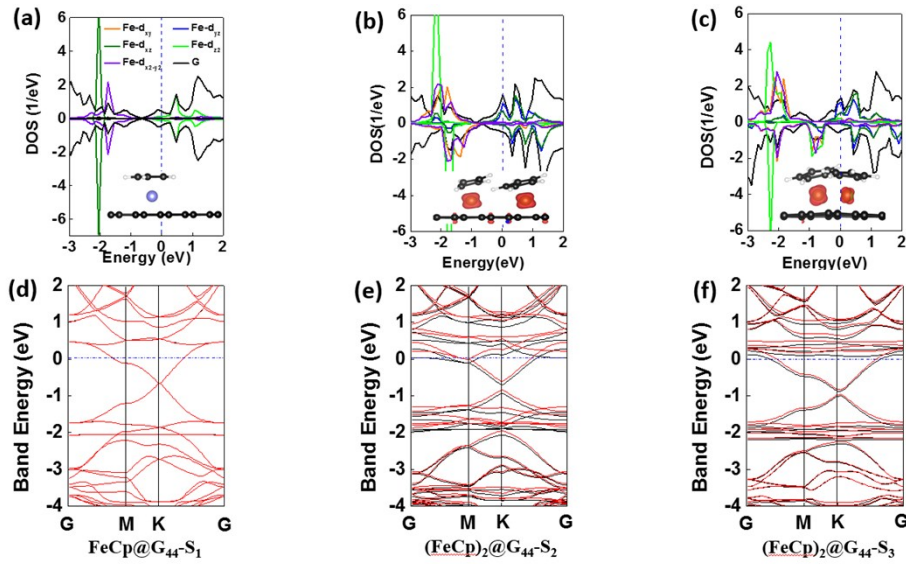

Figure S4. Band structure and the density of states of  $\text{FeCp}@G_{44}\text{-S}_1$ ,  $(\text{FeCp})_2@G_{44}\text{-S}_2$  and  $(\text{FeCp})_2@G_{44}\text{-S}_3$ .

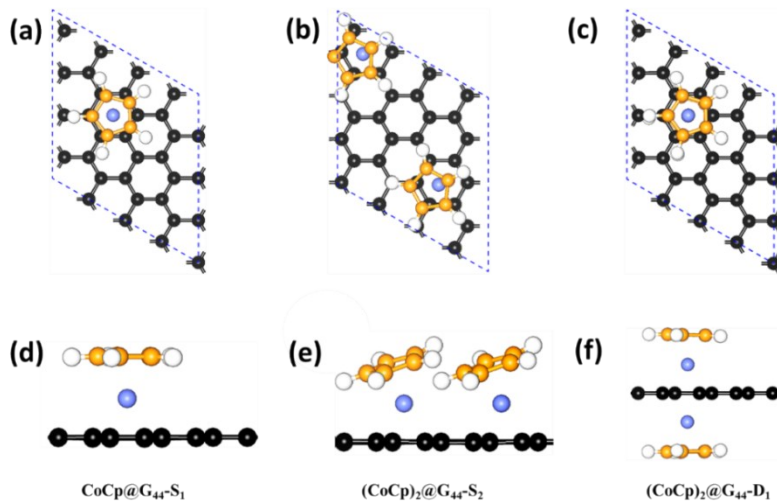

Figure S5. Top and side view of  $\text{CoCp}@G_{44}\text{-S}_1$ ,  $(\text{CoCp})_2@G_{44}\text{-S}_1$  and  $(\text{CoCp})_2@G_{44}\text{-D}_1$ .

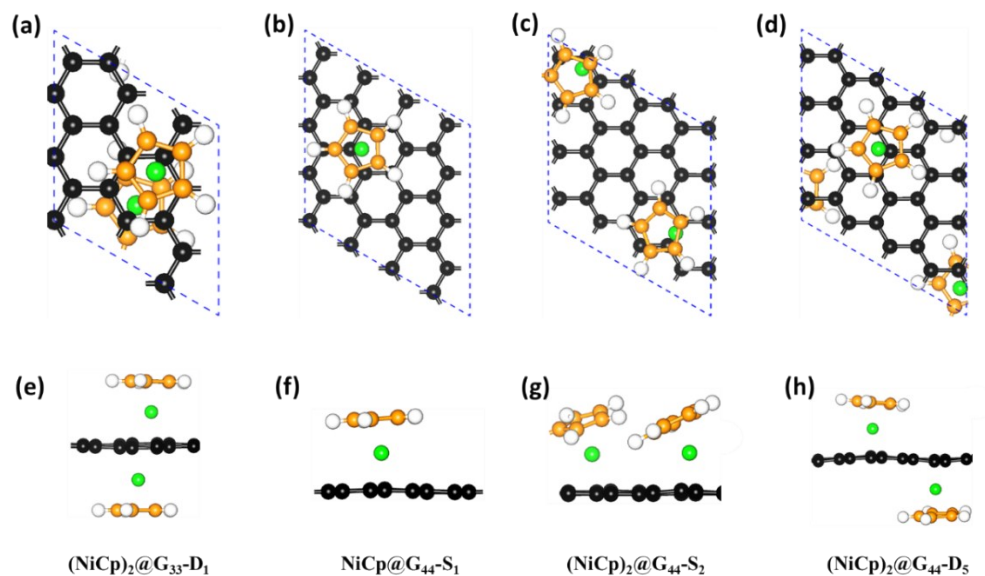

Figure S6. Top and side view of  $(\text{NiCp})_2@G_{33}\text{-D}_1$ ,  $\text{NiCp}@G_{44}\text{-S}_1$ ,  $(\text{NiCp})_2@G_{44}\text{-S}_2$ ,  $(\text{NiCp})_2@G_{44}\text{-D}_5$ ,  $\text{CoCp}@G_{44}\text{-S}_1$ ,  $(\text{CoCp})_2@G_{44}\text{-S}_1$  and  $(\text{CoCp})_2@G_{44}\text{-D}_1$ .

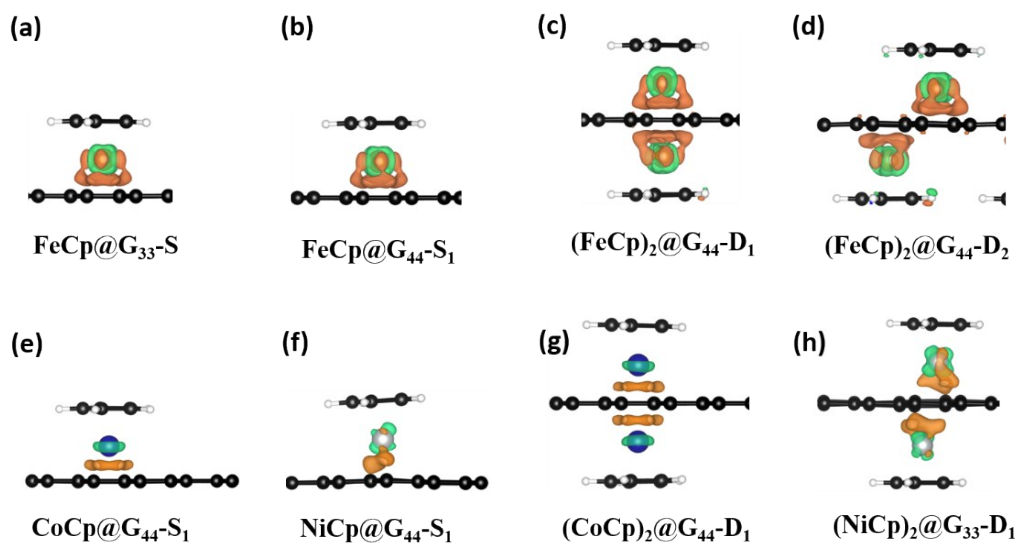

Figure S7. The CDD plots of  $\text{FeBz}@G_{33}$ (a),  $\text{FeBz}@G_{44}\text{-S}$ (b),  $(\text{FeCp})_2@G_{44}\text{-D}_1$ (c),  $(\text{FeCp})_2@G_{44}\text{-D}_2$ (d),  $\text{CoCp}@G_{44}\text{-S}_1$ (e),  $(\text{NiCp})_2@G_{44}\text{-S}_1$ (f),  $(\text{CoCp})_2@G_{44}\text{-D}_1$ ,  $(\text{NiCp})_2@G_{33}\text{-D}_1$ , respectively.

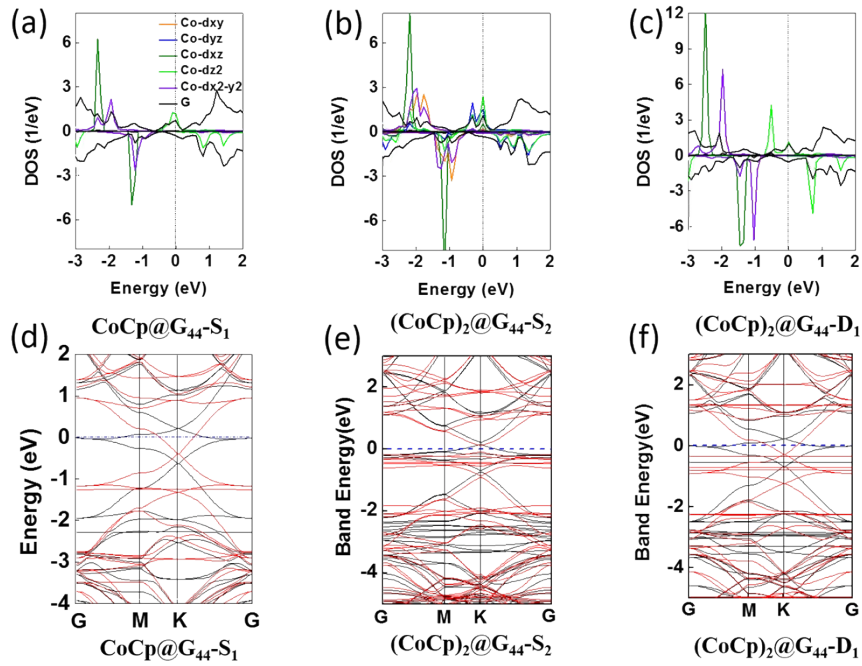

Figure S8. The density of states and bandstructures of  $\text{CoCp}@G_{44}\text{-S}_1$ ,  $(\text{CoCp})_2@G_{44}\text{-S}_1$  and  $(\text{CoCp})_2@G_{44}\text{-D}_1$ .

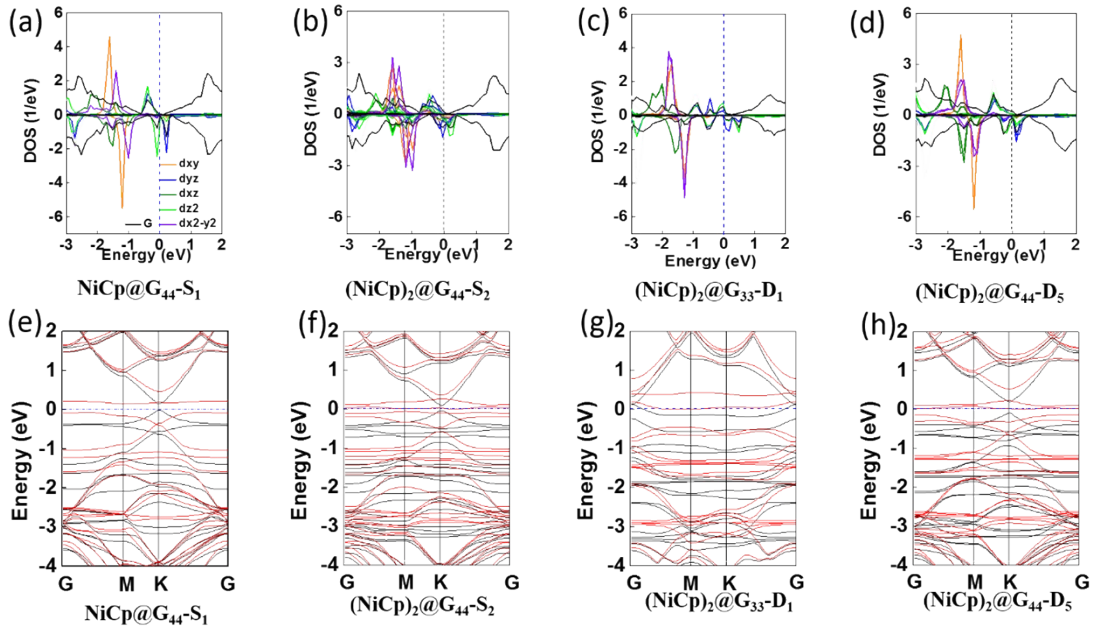

Figure S9. Band structure and the density of states of  $\text{CoCp}@G_{44}\text{-S}_1\text{NiCp}@G_{44}\text{-S}_1$ ,  $(\text{NiCp})_2@G_{44}\text{-S}_2$ ,  $(\text{NiCp})_2@G_{44}\text{-D}_1$  and  $(\text{NiCp})_2@G_{44}\text{-D}_5$ .

Table S1. Systems (sys), C-C ( $D_{C-C}(Cp)$ ) and C-H bond length ( $D_{C-H}$ ) of Cp ligands, C-C bond length of graphene ( $D_{C-C}(G)$ ) of  $FeCp@G_{33s}$  and  $FeCp@G_{44s}$ .

| Sys                   | $D_{C-C}(Cp)(\text{\AA})$ | $D_{C-C}(G) (\text{\AA})$ | $D_{C-H} (\text{\AA})$ |
|-----------------------|---------------------------|---------------------------|------------------------|
| $FeCp@G_{33-S}$       | 1.43                      | 1.42-1.43                 | 1.09                   |
| $Fe_2Cp_2@G_{33}-D_1$ | 1.43-1.44                 | 1.41-1.44                 | 1.09                   |
| $Fe_2Cp_2@G_{33}-D_2$ | 1.43-1.44                 | 1.41-1.44                 | 1.09                   |
| $Fe_2Cp_2@G_{33}-D_3$ | 1.43                      | 1.42-1.44                 | 1.09                   |
| $FeCp@G_{44}-S_1$     | 1.43                      | 1.42-1.44                 | 1.09                   |
| $(FeCp)_2@G_{44}-S_2$ | 1.42-1.44                 | 1.41-1.44                 | 1.08-1.09              |
| $(FeCp)_2@G_{44}-S_3$ | 1.42-1.43                 | 1.41-1.44                 | 1.08-1.09              |
| $(FeCp)_2@G_{44}-D_1$ | 1.42-1.44                 | 1.41-1.45                 | 1.09                   |
| $(FeCp)_2@G_{44}-D_2$ | 1.43-1.44                 | 1.41-1.44                 | 1.09                   |
| $(FeCp)_2@G_{44}-D_3$ | 1.43                      | 1.41-1.45                 | 1.09                   |
| $(FeCp)_2@G_{44}-D_4$ | 1.43                      | 1.41-1.44                 | 1.09                   |
| $(FeCp)_2@G_{44}-D_5$ | 1.43-1.44                 | 1.41-1.44                 | 1.09                   |
